# Supplementary material for: Disrupted apical exocytosis of cargo vesicles causes enteropathy in FHL5 patients with Munc18-2 mutations
Source: JCI journal article supplement (doi:10.1172/jci.insight.94564), 2017-07-19
Supplement: sd1 [file 1]

# Supplemental Figure 1

## A

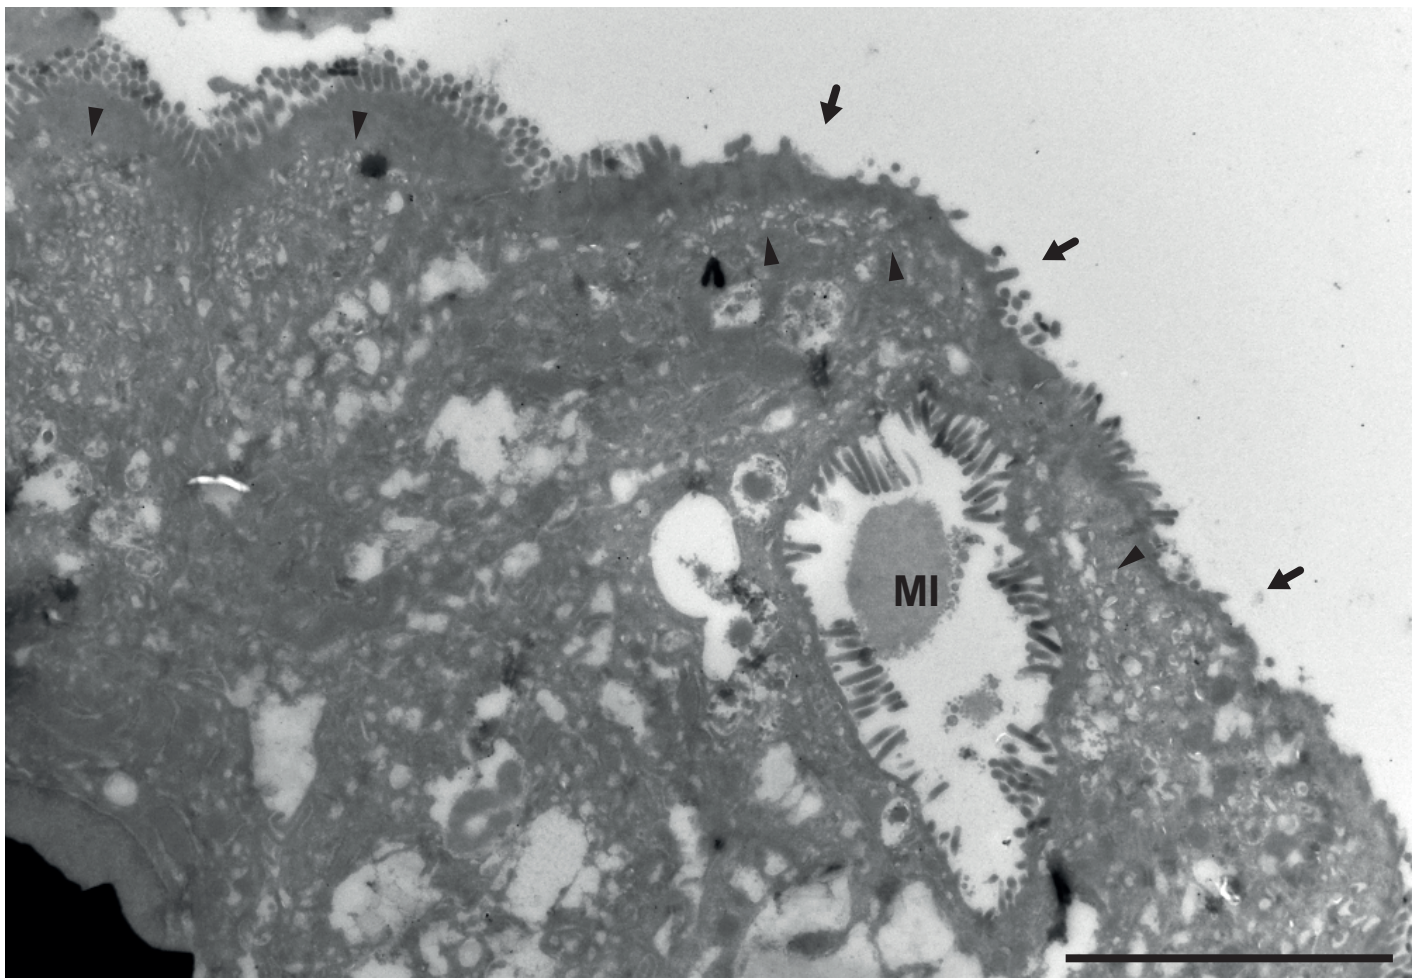

## B

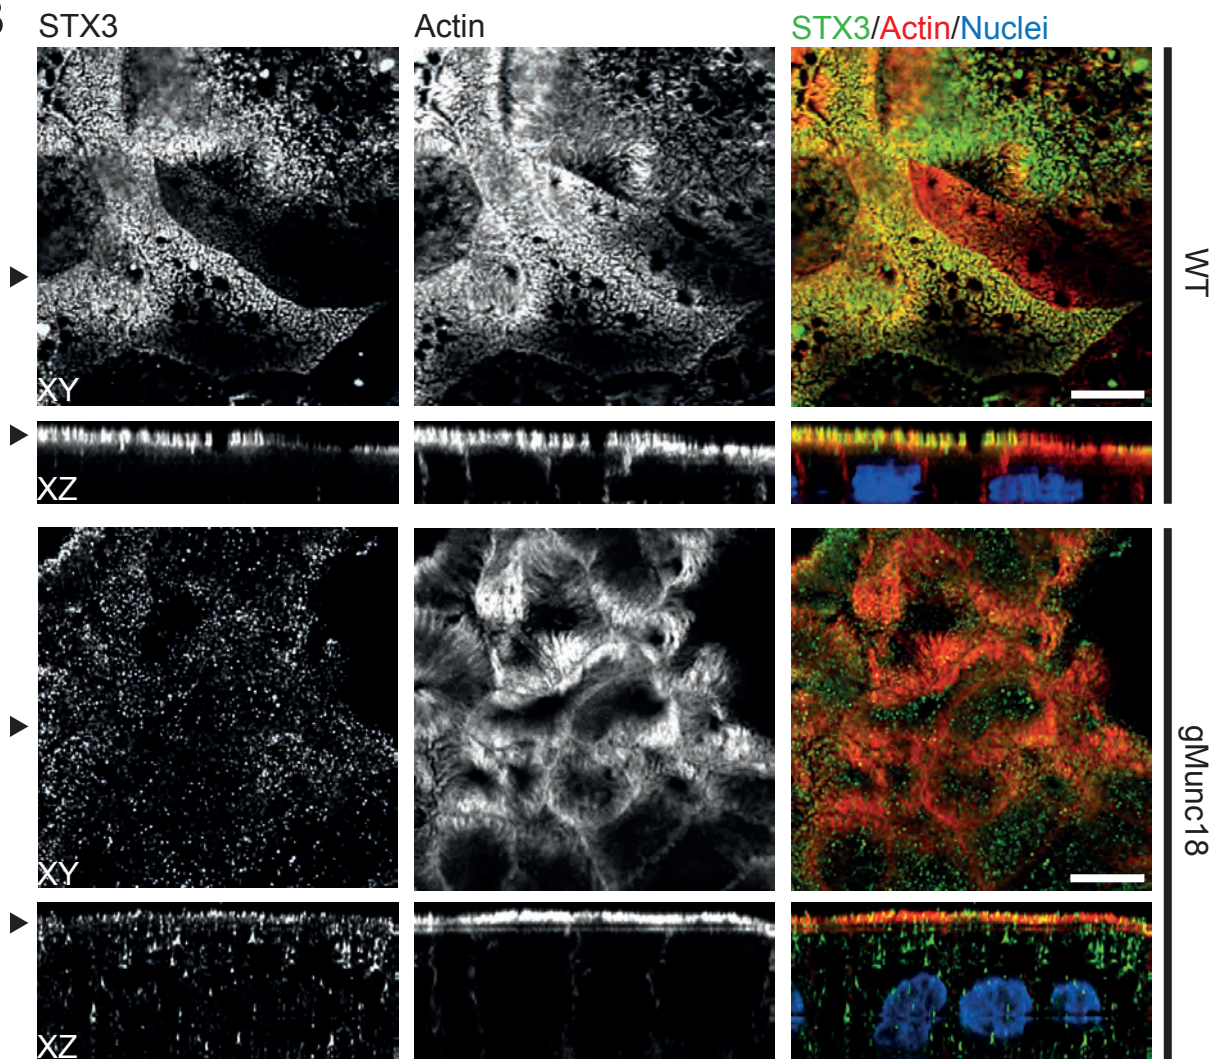

# Supplemental Figure 2

NHE3

Stx3

Rab11

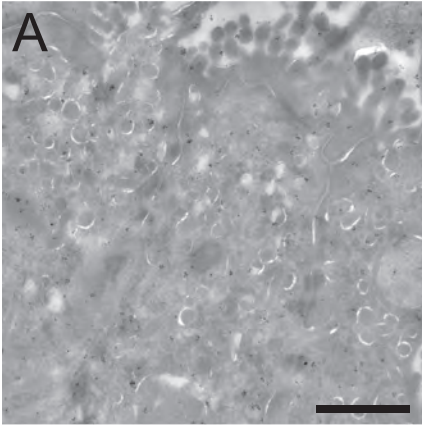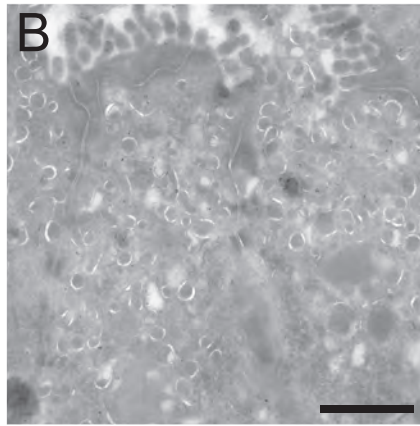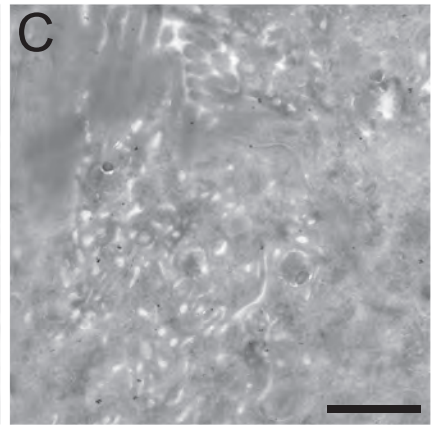

#1

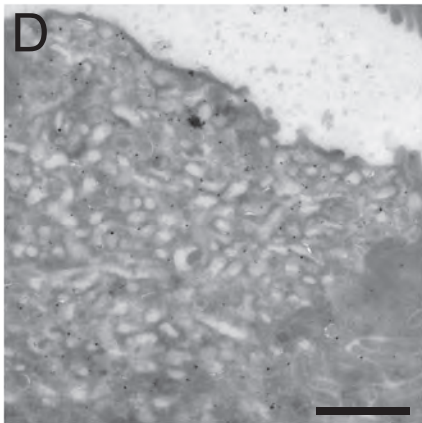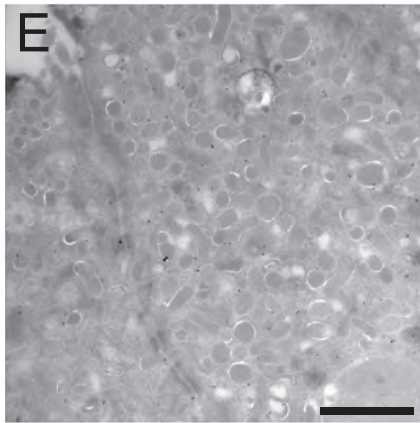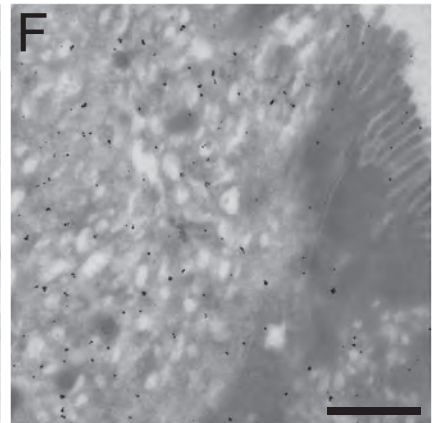

#2

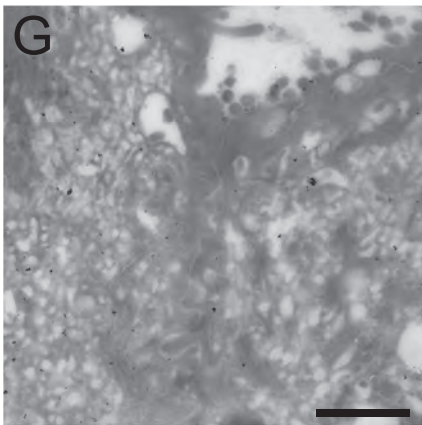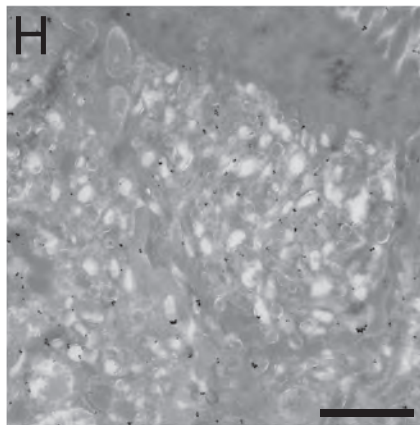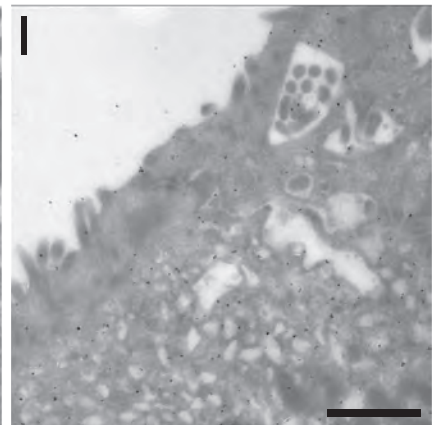

#4

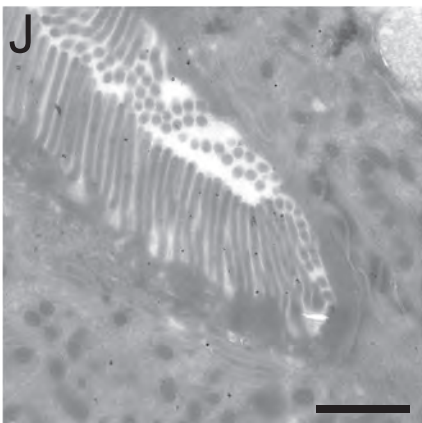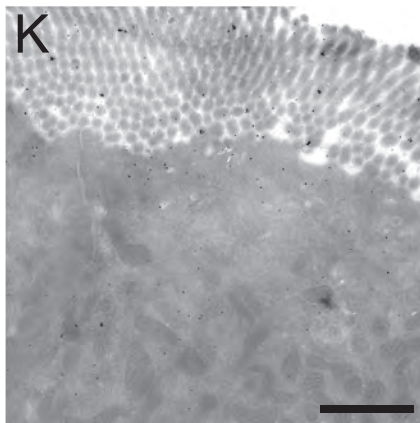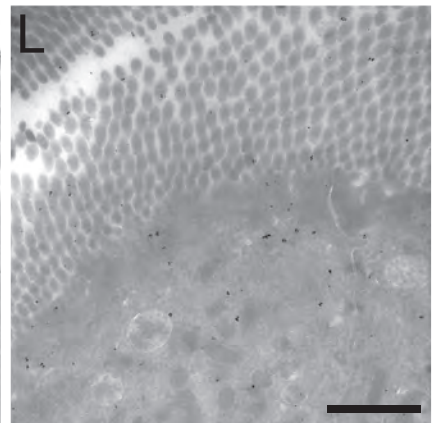

ctrl.

Supplemental Table 1

| Patient/sample                                                                       | #1: FHL 5 biopsy            | #2: FHL 5 biopsy see (12)     | #3: FHL 5 cell monolayer from biopsy-derived organoid | #4: FHL 5 biopsy            | CaCo2 cell model STXBP2 KO | MYO5B-MVID biopsy compiled from (17,31) | STX3-MVID biopsy see (17,18) |
|--------------------------------------------------------------------------------------|-----------------------------|-------------------------------|-------------------------------------------------------|-----------------------------|----------------------------|-----------------------------------------|------------------------------|
| <b>Gene</b>                                                                          | <i>STXBP2</i>               | <i>STBP2</i>                  | <i>STXBP2</i>                                         | <i>STBP2</i>                | <i>STXBP2</i>              | <i>MYO5B</i>                            | <i>STX3</i>                  |
| <b>Mutation</b>                                                                      | c.37+1G>A                   | c.693_695delG<br>AT           | c.902+5G>A                                            | c.1146delC                  | n.a.                       | c.1323-2A>G                             | c.372_373dup                 |
| <b>Clinics</b>                                                                       | diarrhea, failure-to-thrive | pancytopenia, fever, diarrhea | pancytopenia, fever, diarrhea                         | diarrhea, failure-to-thrive | n.a.                       | diarrhea, failure-to-thrive             | diarrhea, failure-to-thrive  |
| <b>Facultative brush-border atrophy</b>                                              | ++                          | +++                           | -                                                     | +++                         | ++                         | + to +++                                | ++                           |
| <b>Microvillus inclusions</b>                                                        | -                           | +                             | -                                                     | ++                          | n.d.                       | + to +++                                | +                            |
| <b>Basolateral microvilli</b>                                                        | +                           | ++                            | +                                                     | ++                          | n.d.                       | - to ++                                 | ++                           |
| <b>PAS-positive, subapical vesicles/tubules (historically: "secretory granules")</b> | +++                         | +++                           | ++                                                    | +++                         | ++                         | +++                                     | +++                          |
| <b>NHE3, Rab11, STX3 labelling of subapical vesicles/tubules</b>                     | ++                          | ++                            | n.d.                                                  | ++                          | ++                         | ++                                      | ++                           |

+++ ... abundant

++ ... regular

+ ... sporadic

- ... not observed

n.a ... not applicable

n.d. ... not determined

### **Supplemental Figure 1:**

(A) Electron micrograph of villus enterocytes from patient#4 showing loss or shortening of apical microvilli (arrows), large clusters of subapical vesicles and tubules (arrowheads) and intracellular microvillus inclusions (MI); scale=5 $\mu$ m.

(B) The apical t-SNARE Stx3 mislocalises upon the deletion of Munc18 in CaCo2 cells. Brush border microvilli are indicated by actin staining; scale=10 $\mu$ m.

### **Supplemental Figure 2:**

Immunogold electron microscopy of thawed cryo-sections from duodenum biopsies of FHL 5 patients #1 (A-C), #2 (D-F), #4 (G-I) and a healthy control (J-K). NHE3, Stx3 and Rab11 mislocalize in FHL 5 patients predominantly to abnormal clusters of vesicles and tubules in the subapical cytoplasm of enterocytes, in contrast to their canonical distribution in controls. scale = 1 $\mu$ m.

### **Supplemental Table 1:**

Synoptic view on the here presented FHL5 patients and cell samples/models in comparison to published MVID-cases with mutated *MYO5B* or *STX3* summarizing clinical, electron microscopic and (immuno)cytochemical characteristics.
